# Supplementary material for: Validation and Evaluation of the Psychometric Properties of an Obstetric Violence Scale
Source: Preprints.org preprint supplement (doi:10.20944/preprints202308.1854.v1), 2023-08-28
Supplement: Supplementary file 1 [file supplementary]

Archive with 7 entries (7 files):
- Supplementary Material Table S1 Nursing Reports VO.pdf
- Supplementary Material S2 Nursing Reports VO.pdf
- Supplementary Material S3  Nursing Reports VO.pdf
- Supplementary Material S4 Nursing Reports VO.pdf
- Supplementary Material S5 Nursing Reports VO.pdf
- Supplementary Material S7 Nuersing Reports VO.pdf
- Supplementary Material Table S6 Nursing Reports VO.pdf
