# Supplementary material for: Validation and Evaluation of the Psychometric Properties of an Obstetric Violence Scale
Source: Preprints.org preprint supplement (doi:10.20944/preprints202308.1854.v1), 2023-08-28
Supplement: Supplementary file 1 [file supplementary › Supplementary Material S2 Nursing Reports VO.pdf]

| <i>Women</i>                                                                                                                        | Item<br>1 | Item<br>2 | Item<br>3 | Item<br>4 | Item<br>5 | Item<br>6 | Item<br>7 | Item<br>8 | Item<br>9 | Item<br>10 | Item<br>11 | Item<br>12 | Item<br>13 | Item<br>14 |
|-------------------------------------------------------------------------------------------------------------------------------------|-----------|-----------|-----------|-----------|-----------|-----------|-----------|-----------|-----------|------------|------------|------------|------------|------------|
| 1                                                                                                                                   | 4         | 4         | 4         | 4         | 4         | 4         | 4         | 4         | 4         | 4          | 4          | 3          | 4          | 4          |
| 2                                                                                                                                   | 4         | 4         | 4         | 4         | 4         | 4         | 4         | 4         | 4         | 4          | 4          | 4          | 4          | 4          |
| 3                                                                                                                                   | 3         | 4         | 4         | 3         | 4         | 4         | 3         | 3         | 3         | 4          | 3          | 3          | 3          | 3          |
| 4                                                                                                                                   | 4         | 4         | 4         | 3         | 3         | 4         | 4         | 4         | 4         | 4          | 4          | 4          | 4          | 3          |
| 5                                                                                                                                   | 4         | 4         | 4         | 4         | 4         | 4         | 4         | 4         | 4         | 4          | 4          | 1          | 4          | 4          |
| 6                                                                                                                                   | 4         | 4         | 4         | 4         | 3         | 4         | 4         | 4         | 4         | 4          | 4          | 3          | 3          | 2          |
| 7                                                                                                                                   | 4         | 4         | 3         | 4         | 4         | 4         | 4         | 4         | 4         | 4          | 4          | 4          | 4          | 4          |
| 8                                                                                                                                   | 4         | 3         | 4         | 4         | 4         | 4         | 4         | 4         | 3         | 4          | 4          | 3          | 4          | 4          |
| 9                                                                                                                                   | 3         | 1         | 1         | 2         | 3         | 4         | 4         | 3         | 3         | 4          | 3          | 4          | 4          | 4          |
| 10                                                                                                                                  | 4         | 4         | 1         | 4         | 4         | 4         | 4         | 4         | 4         | 4          | 4          | 4          | 4          | 4          |
| 11                                                                                                                                  | 4         | 4         | 4         | 4         | 4         | 4         | 4         | 3         | 4         | 4          | 4          | 4          | 2          | 3          |
| 12                                                                                                                                  | 4         | 4         | 4         | 4         | 4         | 3         | 3         | 3         | 4         | 4          | 4          | 3          | 3          | 3          |
| 13                                                                                                                                  | 4         | 4         | 4         | 4         | 4         | 4         | 4         | 4         | 4         | 4          | 4          | 4          | 4          | 4          |
| 14                                                                                                                                  | 4         | 4         | 3         | 4         | 1         | 4         | 2         | 3         | 3         | 4          | 3          | 2          | 2          | 4          |
| 15                                                                                                                                  | 4         | 3         | 4         | 4         | 4         | 4         | 4         | 3         | 4         | 4          | 4          | 4          | 4          | 3          |
| 16                                                                                                                                  | 4         | 4         | 4         | 4         | 4         | 4         | 3         | 4         | 4         | 4          | 4          | 2          | 4          | 4          |
| 17                                                                                                                                  | 4         | 4         | 3         | 3         | 4         | 3         | 3         | 3         | 4         | 4          | 4          | 3          | 3          | 3          |
| 18                                                                                                                                  | 4         | 4         | 4         | 4         | 4         | 4         | 4         | 4         | 4         | 4          | 4          | 4          | 4          | 4          |
| 19                                                                                                                                  | 4         | 3         | 4         | 3         | 4         | 4         | 4         | 4         | 4         | 4          | 3          | 2          | 4          | 4          |
| 20                                                                                                                                  | 4         | 4         | 4         | 4         | 4         | 4         | 4         | 3         | 4         | 4          | 4          | 4          | 4          | 3          |
| <i>M*</i>                                                                                                                           | 3.9       | 3.7       | 3.5       | 3.7       | 3.7       | 3.9       | 3.7       | 3.6       | 3.8       | 4          | 3.8        | 3.2        | 3.6        | 3.5        |
| %**                                                                                                                                 | 100%      | 95%       | 90%       | 95%       | 95%       | 100%      | 95%       | 100%      | 100%      | 100%       | 100%       | 80%        | 90%        | 95%        |
| Mean** Degree of agreement (%) = Number of participants who gave the item a score of 3 or 4/Total number of participants (20) x100% |           |           |           |           |           |           |           |           |           |            |            |            |            |            |

**Supplementary Material S2** Scores from the pilot test with 20 postpartum women, means scores and degree of agreement of each item of the scale
