# Supplementary material for: Validation and Evaluation of the Psychometric Properties of an Obstetric Violence Scale
Source: Preprints.org preprint supplement (doi:10.20944/preprints202308.1854.v1), 2023-08-28
Supplement: Supplementary file 1 [file supplementary › Supplementary Material S3 Nursing Reports VO.pdf]

| <b>Obstetric Violence Scale items</b>                                                                                                                                   | <i>It does not<br/>describe what<br/>happened to<br/>me at all<br/>N (%)</i> | <i>I'm not sure<br/>but I<br/>believe/feel<br/>that this did<br/>not happen<br/>to me<br/>N (%)</i> | <i>I'm not<br/>sure<br/>N (%)</i> | <i>I'm not sure<br/>but I think/feel<br/>that this did<br/>happen to me<br/>N (%)</i> | <i>This definitely<br/>happened to me<br/>N (%)</i> |
|-------------------------------------------------------------------------------------------------------------------------------------------------------------------------|------------------------------------------------------------------------------|-----------------------------------------------------------------------------------------------------|-----------------------------------|---------------------------------------------------------------------------------------|-----------------------------------------------------|
| 1- Members of the healthcare staff made ironic or derogative comments or made jokes about your behavior.                                                                | <b>236<br/>(92.2%)</b>                                                       | <b>5<br/>(2.0%)</b>                                                                                 | <b>3<br/>(1.2%)</b>               | <b>2<br/>(0.8%)</b>                                                                   | <b>10<br/>(3.9%)</b>                                |
| 2- You were addressed to with nicknames or diminutives (e.g., mummy, chubby, etc.) or treated as if you were unable to understand the processes you were going through. | <b>244<br/>(95.3%)</b>                                                       | <b>6<br/>(2.3%)</b>                                                                                 | <b>0<br/>(0%)</b>                 | <b>3<br/>(1.2%)</b>                                                                   | <b>3<br/>(1.2%)</b>                                 |
| 3- You felt treated as a child or neglected by the staff, as if you were unable to make decisions about what was happening to you before, during or after delivery.     | <b>226<br/>(88.3%)</b>                                                       | <b>12<br/>(4.7%)</b>                                                                                | <b>8<br/>(3.1%)</b>               | <b>2<br/>(0.8%)</b>                                                                   | <b>8<br/>(3.1%)</b>                                 |
| 4- You were somehow criticized for expressing your emotions (cry, scream of pain, etc.) during labor or delivery.                                                       | <b>233<br/>(91.0%)</b>                                                       | <b>6<br/>(2.3%)</b>                                                                                 | <b>5<br/>(2.0%)</b>               | <b>2<br/>(0.8%)</b>                                                                   | <b>10<br/>(3.9%)</b>                                |
| 5- It was impossible for you to ask queries or express your fears or concerns because nobody answered, or they answered in a bad way.                                   | <b>236<br/>(92.2%)</b>                                                       | <b>8<br/>(3.1%)</b>                                                                                 | <b>3<br/>(1.2%)</b>               | <b>2<br/>(0.8%)</b>                                                                   | <b>7<br/>(2.7%)</b>                                 |
| 6-You were subjected to medical procedures without asking your consent or without explaining why such procedures were needed.                                           | <b>217<br/>(84.8%)</b>                                                       | <b>14<br/>(5.5%)</b>                                                                                | <b>6<br/>(2.3%)</b>               | <b>5<br/>(2.0%)</b>                                                                   | <b>14<br/>(5.5%)</b>                                |
| 7-At the moment of delivery, you were compelled to keep lying on your back despite you expressed you discomfort with that position.                                     | <b>229<br/>(89.5%)</b>                                                       | <b>7<br/>(2.7%)</b>                                                                                 | <b>5<br/>(2.0%)</b>               | <b>6<br/>(2.3%)</b>                                                                   | <b>9<br/>(3.5%)</b>                                 |
| 8-You were compelled to stay in bed and prevented from walking or seeking the position you needed.                                                                      | <b>233<br/>(91.0%)</b>                                                       | <b>8<br/>(3.1%)</b>                                                                                 | <b>4<br/>(1.6%)</b>               | <b>4<br/>(1.6%)</b>                                                                   | <b>7<br/>(2.7%)</b>                                 |
| 9-You were not allowed to be accompanied by someone you trusted in.                                                                                                     | <b>243<br/>(94.9%)</b>                                                       | <b>2<br/>(0.8%)</b>                                                                                 | <b>2<br/>(0.8%)</b>               | <b>3<br/>(1.2%)</b>                                                                   | <b>6<br/>(2.3%)</b>                                 |
| 10-You were prevented from having immediate contact with your                                                                                                           | <b>237<br/>(92.6%)</b>                                                       | <b>3<br/>(1.2%)</b>                                                                                 | <b>3<br/>(1.2%)</b>               | <b>5<br/>(2.0%)</b>                                                                   | <b>8<br/>(3.1%)</b>                                 |

|                                                                                                                            |                              |                            |                           |                           |                            |
|----------------------------------------------------------------------------------------------------------------------------|------------------------------|----------------------------|---------------------------|---------------------------|----------------------------|
| newborn, before the doctor took him/her away (caressing, holding him/her in your arms, etc.).                              |                              |                            |                           |                           |                            |
| 11-After delivery, they make you feel you had not behaved up to what was expected of you (that you had not "helped").      | <b>247</b><br><b>(96.5%)</b> | <b>3</b><br><b>(1.2%)</b>  | <b>2</b><br><b>(0.8%)</b> | <b>2</b><br><b>(0.8%)</b> | <b>2</b><br><b>(0.8%)</b>  |
| 12-Your childbirth care experience made you feel vulnerable, guilty or insecure in any sense.                              | <b>230</b><br><b>(89.8%)</b> | <b>8</b><br><b>(3.1%)</b>  | <b>7</b><br><b>(2.7%)</b> | <b>5</b><br><b>(2.0%)</b> | <b>6</b><br><b>(2.3%)</b>  |
| 13-After delivery, you were denied the opportunity to use a birth control device or procedure (IUD, tubal ligation, etc.). | <b>246</b><br><b>(96.1%)</b> | <b>3</b><br><b>(1.2%)</b>  | <b>3</b><br><b>(1.2%)</b> | <b>2</b><br><b>(0.8%)</b> | <b>2</b><br><b>(0.8%)</b>  |
| 14-During or after labor, you felt exposed to the gaze of other people unknown to you (exposure to strangers).             | <b>212</b><br><b>(82.8%)</b> | <b>14</b><br><b>(5.5%)</b> | <b>4</b><br><b>(1.6%)</b> | <b>7</b><br><b>(2.7%)</b> | <b>19</b><br><b>(7.4%)</b> |
| N=Frequency %=Percentage                                                                                                   |                              |                            |                           |                           |                            |

Supplementary Material Table S3. Frequencies and response percentages of each item of Obstetric Violence Scale
