# Supplementary material for: Validation and Evaluation of the Psychometric Properties of an Obstetric Violence Scale
Source: Preprints.org preprint supplement (doi:10.20944/preprints202308.1854.v1), 2023-08-28
Supplement: Supplementary file 1 [file supplementary › Supplementary Material S4 Nursing Reports VO.pdf]

| FINAL JMLE ITEM STATISTICS                                                     |            |            |         |          |      |          |
|--------------------------------------------------------------------------------|------------|------------|---------|----------|------|----------|
| Item                                                                           | Difficulty | Std. Error | WMS     | Std. WMS | UMS  | Std. UMS |
| v1                                                                             | -0,09      | 0,09       | 1,09    | 0,47     | 1,17 | 0,49     |
| v2                                                                             |            |            | DROPPED |          |      |          |
| v3                                                                             | -0,08      | 0,10       | 0,85    | -0,77    | 0,83 | -0,50    |
| v4                                                                             | -0,11      | 0,09       | 1,18    | 0,92     | 1,38 | 1,00     |
| v5                                                                             | 0,02       | 0,11       | 0,77    | -0,99    | 0,58 | -0,98    |
| v6                                                                             | -0,32      | 0,08       | 1,08    | 0,54     | 1,06 | 0,30     |
| v7                                                                             | -0,11      | 0,09       | 1,06    | 0,40     | 1,07 | 0,33     |
| v8                                                                             | -0,00      | 0,10       | 0,92    | -0,30    | 0,76 | -0,55    |
| v9                                                                             | 0,10       | 0,11       | 1,16    | 0,69     | 1,16 | 0,45     |
| v10                                                                            | -0,03      | 0,10       | 1,02    | 0,18     | 0,95 | 0,05     |
| v11                                                                            | 0,54       | 0,15       | 0,86    | -0,27    | 0,37 | -1,10    |
| v12                                                                            | 0,02       | 0,10       | 0,58    | -2,51    | 0,45 | -2,10    |
| v13                                                                            | 0,53       | 0,15       | 1,09    | 0,38     | 1,13 | 0,41     |
| v14                                                                            | -0,46      | 0,08       | 1,21    | 1,43     | 1,17 | 0,76     |
| Item dropped due to unobserved categories. Collapse categories to retain item. |            |            |         |          |      |          |

Supplementary Material Table S4. First Rasch analysis by Joint Maximum Likelihood estimation (JMLE) with all the items.
