# Supplementary material for: Validation and Evaluation of the Psychometric Properties of an Obstetric Violence Scale
Source: Preprints.org preprint supplement (doi:10.20944/preprints202308.1854.v1), 2023-08-28
Supplement: Supplementary file 1 [file supplementary › Supplementary Material S5 Nursing Reports VO.pdf]

| CORRELATION MATRIX |         |         |         |         |         |         |         |         |         |         |         |         |         |
|--------------------|---------|---------|---------|---------|---------|---------|---------|---------|---------|---------|---------|---------|---------|
|                    | v1      | v3      | v4      | v5      | v6      | v7      | v8      | v9      | v10     | v11     | v12     | v13     | v14     |
| v1                 | 1,0000  | 0,1957  | 0,3350  | 0,0299  | -0,1942 | -0,0632 | -0,3149 | -0,1424 | -0,2318 | -0,2053 | -0,1070 | -0,0744 | -0,3118 |
| v3                 | 0,1957  | 1,0000  | -0,0162 | 0,2082  | -0,0100 | -0,2608 | -0,2807 | -0,0955 | -0,1565 | -0,0448 | 0,2528  | -0,2464 | -0,3248 |
| v4                 | 0,3350  | -0,0162 | 1,0000  | -0,0261 | -0,2984 | -0,1485 | -0,2952 | -0,1721 | -0,1718 | 0,0330  | -0,0297 | -0,0631 | -0,1926 |
| v5                 | 0,0299  | 0,2082  | -0,0261 | 1,0000  | -0,0823 | -0,2700 | -0,1982 | -0,2780 | -0,0809 | -0,0720 | 0,2525  | -0,2074 | -0,0542 |
| v6                 | -0,1942 | -0,0100 | -0,2984 | -0,0823 | 1,0000  | -0,2574 | -0,1494 | -0,0508 | 0,0335  | -0,0453 | -0,0764 | -0,0475 | -0,0105 |
| v7                 | -0,0632 | -0,2608 | -0,1485 | -0,2700 | -0,2574 | 1,0000  | 0,5224  | 0,0141  | -0,2068 | -0,1065 | -0,1750 | 0,0241  | -0,1515 |
| v8                 | -0,3149 | -0,2807 | -0,2952 | -0,1982 | -0,1494 | 0,5224  | 1,0000  | -0,0166 | -0,0281 | -0,1878 | -0,1521 | 0,1069  | -0,0309 |
| v9                 | -0,1424 | -0,0955 | -0,1721 | -0,2780 | -0,0508 | 0,0141  | -0,0166 | 1,0000  | 0,1919  | -0,2063 | -0,1278 | 0,0670  | -0,2004 |
| v10                | -0,2318 | -0,1565 | -0,1718 | -0,0809 | 0,0335  | -0,2068 | -0,0281 | 0,1919  | 1,0000  | -0,1772 | -0,2613 | -0,0000 | -0,0359 |
| v11                | -0,2053 | -0,0448 | 0,0330  | -0,0720 | -0,0453 | -0,1065 | -0,1878 | -0,2063 | -0,1772 | 1,0000  | 0,2767  | 0,0257  | 0,1483  |
| v12                | -0,1070 | 0,2528  | -0,0297 | 0,2525  | -0,0764 | -0,1750 | -0,1521 | -0,1278 | -0,2613 | 0,2767  | 1,0000  | -0,3090 | -0,1139 |
| v13                | -0,0744 | -0,2464 | -0,0631 | -0,2074 | -0,0475 | 0,0241  | 0,1069  | 0,0670  | -0,0000 | 0,0257  | -0,3090 | 1,0000  | -0,0406 |
| v14                | -0,3118 | -0,3248 | -0,1926 | -0,0542 | -0,0105 | -0,1515 | -0,0309 | -0,2004 | -0,0359 | 0,1483  | -0,1139 | -0,0406 | 1,0000  |

Supplementary Material S5 Correlation matrix. Yen Q3 Test
