# Supplementary material for: Validation and Evaluation of the Psychometric Properties of an Obstetric Violence Scale
Source: Preprints.org preprint supplement (doi:10.20944/preprints202308.1854.v1), 2023-08-28
Supplement: Supplementary file 1 [file supplementary › Supplementary Material S7 Nuersing Reports VO.pdf]

| Primary School (n=61)<br>(a)                                                                                                                           | Secondary School<br>(n=103)<br>(b)                                  |                                               | University<br>(n=92)<br>(c)                    |                | Kruskall<br>Wallis<br>Test | Effect<br>size | Post Hoc Test                            |
|--------------------------------------------------------------------------------------------------------------------------------------------------------|---------------------------------------------------------------------|-----------------------------------------------|------------------------------------------------|----------------|----------------------------|----------------|------------------------------------------|
| M(SD)                                                                                                                                                  | M(SD)                                                               |                                               | M(SD)                                          | X <sup>2</sup> | Value p                    | ε <sup>2</sup> | Dwass-Steel-<br>Critchlow-<br>Fligne     |
| 1.48 (3.49)                                                                                                                                            | 3.06 (5.83)                                                         |                                               | 4.03 (8.45)                                    | 5.24           | 0.073                      | 0.002          | No<br>differences<br>between<br>groups   |
| Normal vaginal delivery<br>(n=199)<br>(a)                                                                                                              | Dystocic<br>vaginal<br>delivery<br>with<br>forceps<br>(n=17)<br>(b) | Dystocic delivery<br>with vacuum (n=7)<br>(c) | Unplanned<br>cesarean section<br>(n=33)<br>(d) |                | Kruskall<br>Wallis<br>Test | Effect<br>size | Post Hoc Test                            |
| M(SD)                                                                                                                                                  | M(SD)                                                               | M(SD)                                         | M(SD)                                          | X <sup>2</sup> | Value p                    | ε <sup>2</sup> | Dwass-<br>Steel-<br>Critchlow-<br>Fligne |
| 2.01<br>(4.50)                                                                                                                                         | 6.35<br>(9.57)                                                      | 1.86<br>(4.49)                                | 7.76<br>(11.45)                                | 15.06          | 0.001*                     | 0.006          | a,d                                      |
| Center 1<br>(n=188) (a)                                                                                                                                | Center<br>2 (n=24)<br>(b)                                           | Center 3<br>(n=29) ©                          | Center 4<br>(n=15) (d)                         |                | Kruskall<br>Wallis<br>Test | Effect<br>size | Post Hoc Test                            |
| M(SD)                                                                                                                                                  | M(SD)                                                               | M(SD)                                         | M(SD)                                          | X <sup>2</sup> | Value p                    | ε <sup>2</sup> | Dwass-<br>Steel-<br>Critchlow-<br>Fligne |
| 3.44<br>(6.98)                                                                                                                                         | 1.17<br>(2.96)                                                      | 3.00<br>(7.04)                                | 0.93<br>(1.58)                                 | 4.23           | 0.238                      | 0.016          | No<br>differences<br>between<br>groups   |
| M(SD): Mean(Standard Deviation).<br>X <sup>2</sup> =Chi Squared<br>ε <sup>2</sup> = Epsilon squared. Effect size from 0 to 1 (1 being maximum effect). |                                                                     |                                               |                                                |                |                            |                |                                          |

Supplementary Material Table S7. Means, standard deviations, p-value, contrast statistic and effect size for variables in more than two groups.
