# Supplementary material for: Validation and Evaluation of the Psychometric Properties of an Obstetric Violence Scale
Source: Preprints.org preprint supplement (doi:10.20944/preprints202308.1854.v1), 2023-08-28
Supplement: Supplementary file 1 [file supplementary › Supplementary Material Table S1 Nursing Reports VO.pdf]

|                 | PROFESSION   | GENDER | PROFILE                                                                                                                                                                                                                                                                                                                                                                                                          |
|-----------------|--------------|--------|------------------------------------------------------------------------------------------------------------------------------------------------------------------------------------------------------------------------------------------------------------------------------------------------------------------------------------------------------------------------------------------------------------------|
| <b>Expert 1</b> | Midwife      | Women  | Coordinator of the Low Intervention Childbirth group of the Andalusian Association of Midwives. Teacher in Perinatal Mental Health training.                                                                                                                                                                                                                                                                     |
| <b>Expert 2</b> | Nurse        | Women  | PhD. Professor at the Universitat Jaume I (Castelló). Collaborator in nursing degree studies and with the advanced breastfeeding program at Blanquerna University. Published multiple studies on Obstetric Violence and creator of the PercOV-S questionnaire.                                                                                                                                                   |
| <b>Expert 3</b> | Midwife      | Women  | Midwife in Primary Care in Gran Canaria. Teaching collaborator. Responsible for the area of midwifery in the College of Nursing of Las Palmas for 20 years.                                                                                                                                                                                                                                                      |
| <b>Expert 4</b> | Midwife      | Women  | PhD. Associate Professor at the University of La Laguna and works in assistance programs in the Canary Health Service in the area of women. She is a member of the group Obstetric Violence Observatory of the Ministry of Health.                                                                                                                                                                               |
| <b>Expert 5</b> | Obstetrician | Man    | PhD. Associate Professor at the University of Las Palmas de Gran Canaria. Head of Obstetrics and Gynecology Section of the Complejo Hospitalario Universitario Insular Materno Infantil de Canarias. Master in Bioethics. Member of the Provincial Ethics Committee.                                                                                                                                             |
| <b>Expert 6</b> | Midwife      | Women  | Midwife attached to the Multiprofessional Teaching Unit of Obstetrics and Gynecology. Speaker at national and international congresses and conferences related to maternity, childbirth, lactation and pelvic floor. Author of research papers published in national and international scientific journals. IP research study in collaboration with the Pelvic Floor Rehabilitation Unit of the Negrín Hospital. |
| <b>Expert 7</b> | Midwife      | Women  | Midwife at Complejo Hospitalario Universitario Insular Materno Infantil de Canarias. Teaching collaborator, assistance and TFE tutor in the Multidisciplinary Unit of Obstetrics and Gynecology. President of ACAMAT. Doctoral thesis on Obstetric Violence.                                                                                                                                                     |
| <b>Expert 8</b> | Obstetrician | Women  | Gynecologist and Obstetrician at the General Hospital of Fuerteventura Virgen de la Peña.                                                                                                                                                                                                                                                                                                                        |

Supplementary Material Table S1. Professional profiles of the experts participating in the content validation process
